# Supplementary material for: Distinct conformers of amyloid beta accumulate in the neocortex of patients with rapidly progressive Alzheimer's disease
Source: PubMed Central journal article supplement — J Biol Chem. 2021 Sep 30;297(5):101267. doi: 10.1016/j.jbc.2021.101267 (PMC8531671; doi:10.1016/j.jbc.2021.101267), 2021-09-30
Supplement: mmc1.pdf [file mmc1.pdf]

## Supporting information

**Table S1. The numbers of cored and diffuse plaques labeled with qFTAA and hFTAA in different neocortex regions of rpAD and spAD cases.**

| LCOs-stained plaques | Rapidly Progressive AD |           |          | Slowly Progressive AD |           |          |
|----------------------|------------------------|-----------|----------|-----------------------|-----------|----------|
|                      | Frontal                | Occipital | Temporal | Frontal               | Occipital | Temporal |
| qFTAA (Cored)        | 65                     | 63        | 59       | 49                    | 46        | 47       |
| qFTAA (Diffuse)      | 41                     | 38        | 26       | 30                    | 39        | 53       |
| hFTAA (Cored)        | 34                     | 24        | 16       | 12                    | 15        | 14       |
| hFTAA (Diffuse)      | 50                     | 42        | 44       | 14                    | 36        | 27       |

**Table S2. Heat map of statistical differences between rpAD and spAD for distinct amyloid plaque morphotypes labeled with qFTAA and hFTAA.** Distribution of p-values for different spectral attributes of (A) hFTAA and (B) qFTAA in diffuse and cored plaques in different anatomical areas of rpAD and spAD cases

A

| Plaques type | hFTAA spectrum<br>wv ratio | Frontal<br>P | Occipital<br>P | Temporal<br>P |
|--------------|----------------------------|--------------|----------------|---------------|
| Diffuse      | 550/510                    | 0.773851     | 0.072882       | 0.000023      |
|              | 580/510                    | 0.91783      | 0.074463       | 0.000039      |
|              | 580/500                    | 0.775709     | 0.177533       | 0.002167      |
|              | 550/500                    | 0.869628     | 0.169321       | 0.002172      |
| Cored        | 550/510                    | 0.005598     | 0.11206        | 0.002965      |
|              | 580/510                    | 0.006311     | 0.116872       | 0.005995      |
|              | 550/500                    | 0.000068     | 0.000547       | 0.009073      |
|              | 580/500                    | 0.000118     | 0.02255        | 0.016235      |

B

| Plaques type | qFTAA spectrum<br>wv ratio | Frontal<br>P | Occipital<br>P | Temporal<br>P |
|--------------|----------------------------|--------------|----------------|---------------|
| Cored        | 500/510                    | 0.00035      | 0.084676       | 0.002149      |
| Diffuse      | 500/510                    | 0.000343     | 0.000001       | 0.526484      |

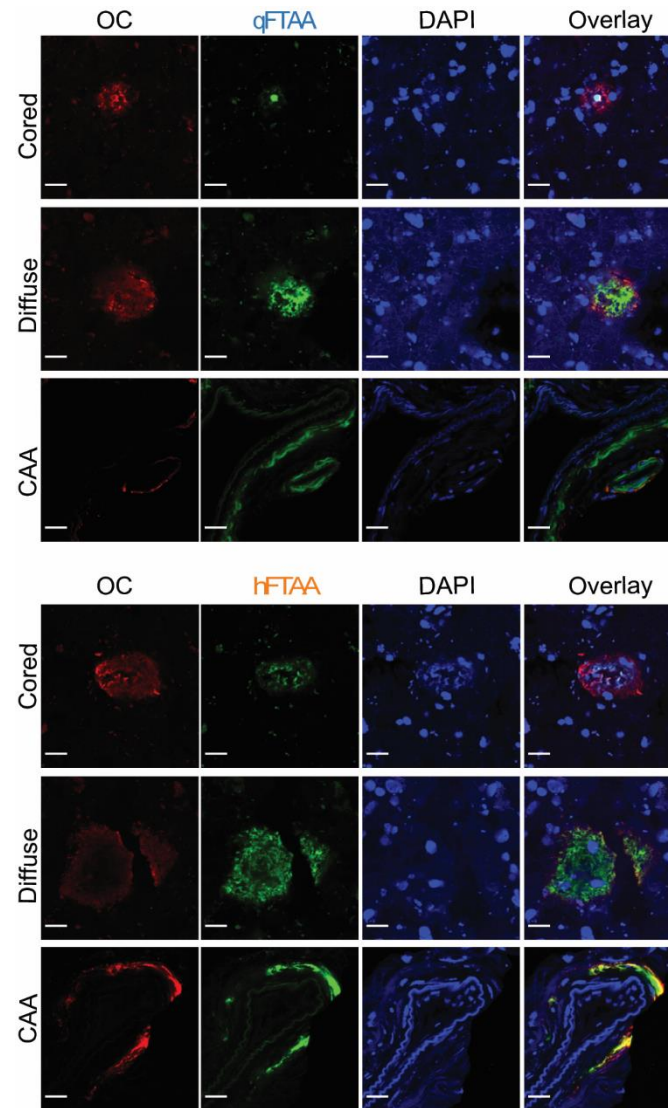

**Figure S1. Distinct deposit patterns of A $\beta$  detected with qFTAA, hFTAA, and conformation-sensitive antibody (OC).** Typical confocal fluorescent images obtained with qFTAA, hFTAA, and conformation-sensitive OC antibody in different amyloid plaque morphotypes and cerebral amyloid angiopathy (CAA). Red fluorescence represents OC-positive A $\beta$  deposits; green fluorescence represents A $\beta$  aggregates labeled with qFTAA or hFTAA; DAPI-stained nuclei are in blue; scale bars – 20 $\mu$ m.
